# Supplementary material for: Transferrin receptor uptakes iron from tumor-associated neutrophils to regulate invasion patterns of OSCC
Source: PubMed Central journal article supplement — Cancer Immunol Immunother. 2025 Jan 3;74(2):43. doi: 10.1007/s00262-024-03894-0 (PMC11699170; doi:10.1007/s00262-024-03894-0), 2025-01-03
Supplement: 262_2024_3894_MOESM1_ESM.pdf [file 262_2024_3894_MOESM1_ESM.pdf]

supplementary Figure 1

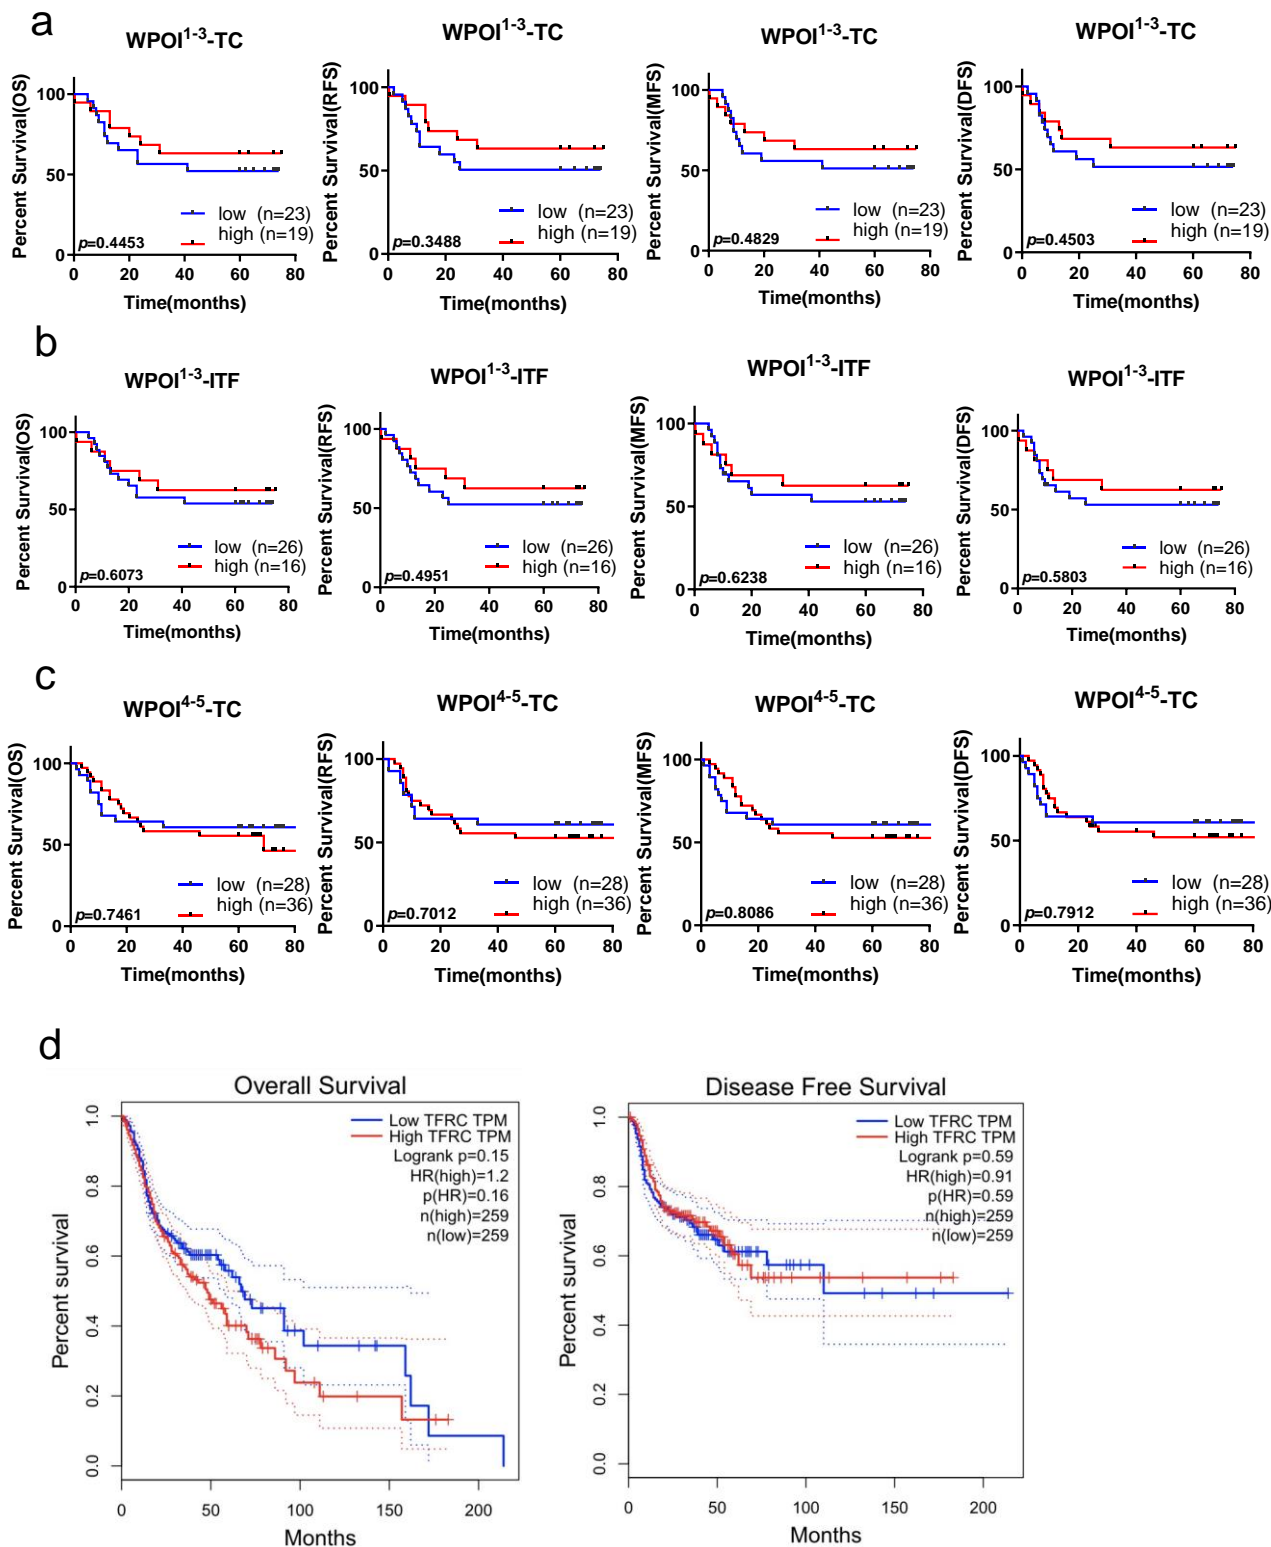

**supplementary Fig. 1 Survival of OSCC patients from our sample bank and TCGA database**

(a) Kaplan-Meier curves of OS, RFS, MFS and DFS between TFRC high(n=19) and low (n=23) expression patients at TC in WPOI<sup>1-3</sup> OSCC,  $P$ =Log-rank (Mantel-Cox) test. (b) Kaplan-Meier curves of OS, RFS, MFS and DFS between TFRC high (n=26) and low (n=16) expression patients at ITF in WPOI<sup>1-3</sup> OSCC,  $P$ =Log-rank (Mantel-Cox) test. (c) Kaplan-Meier curves of OS, RFS, MFS and DFS between TFRC high (n=36) and low (n=28) expression patients at TC in WPOI<sup>4-5</sup> OSCC,  $P$ =Log-rank (Mantel-Cox) test. (d) Kaplan-Meier curves of OS and DFS between TFRC high (n=259) and low (n=259) expression patients at OSCC,  $P$ =Log-rank (Mantel-Cox) test.

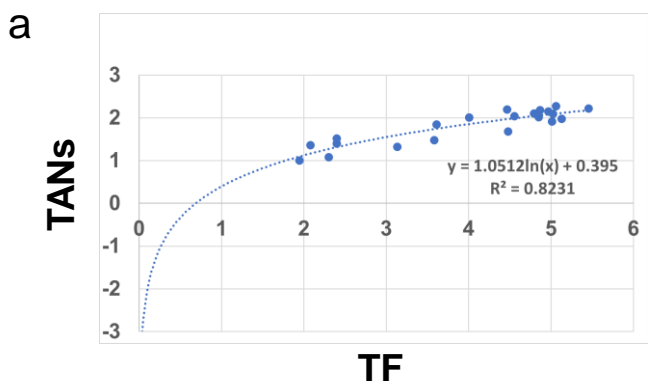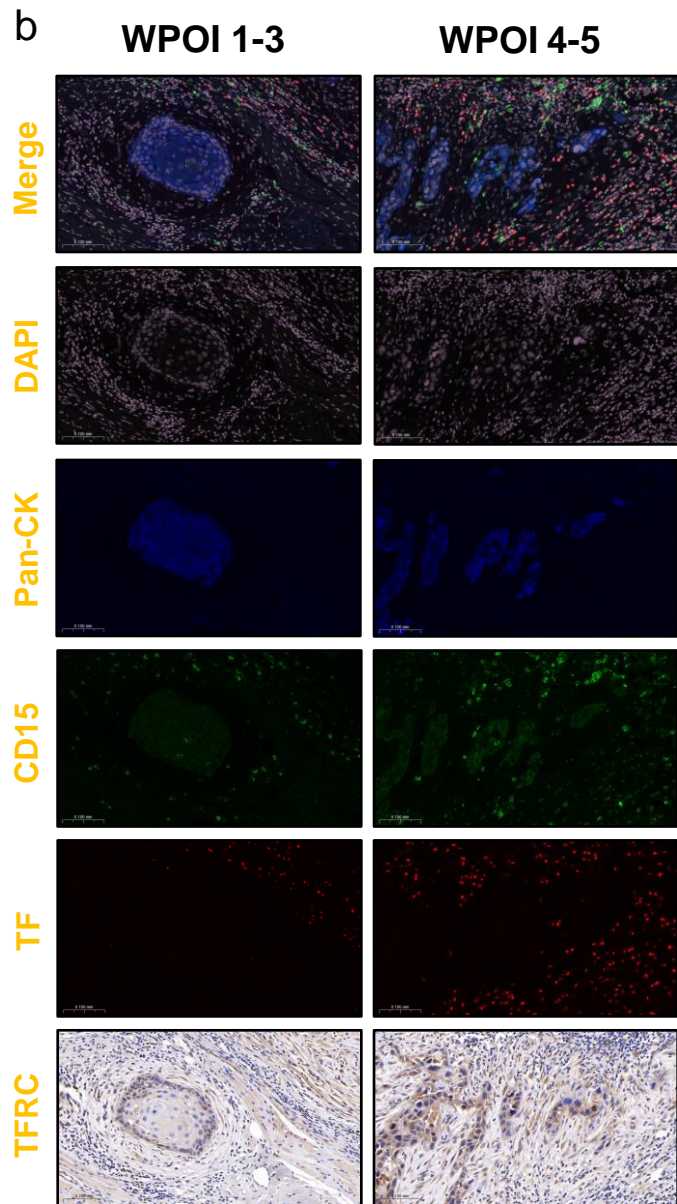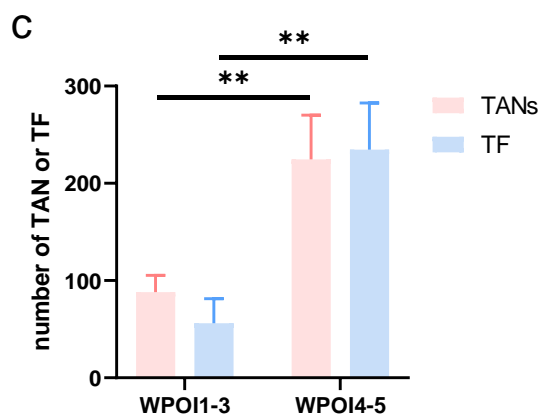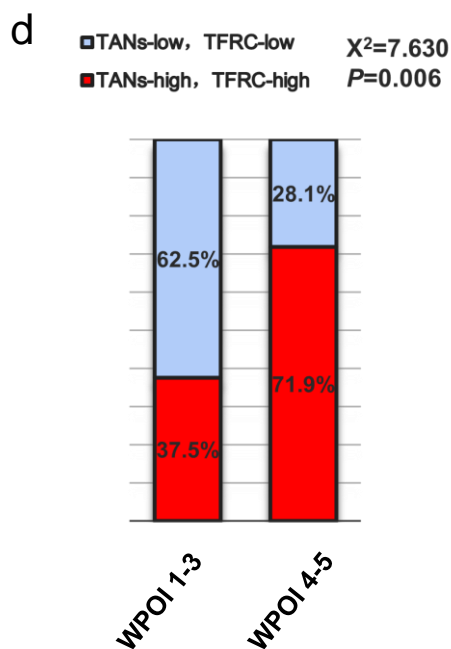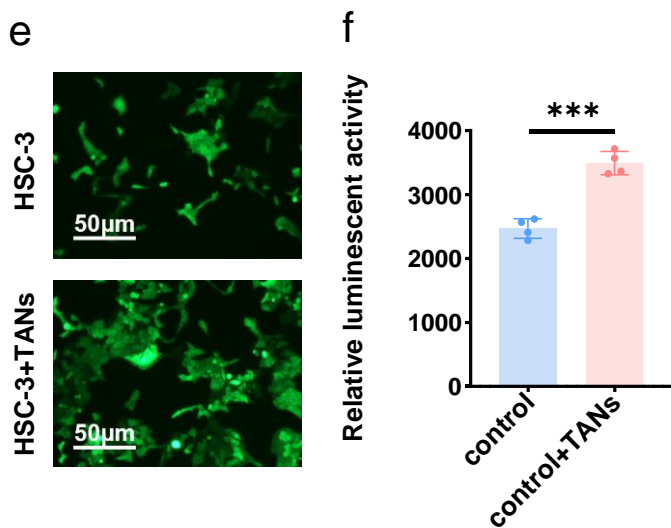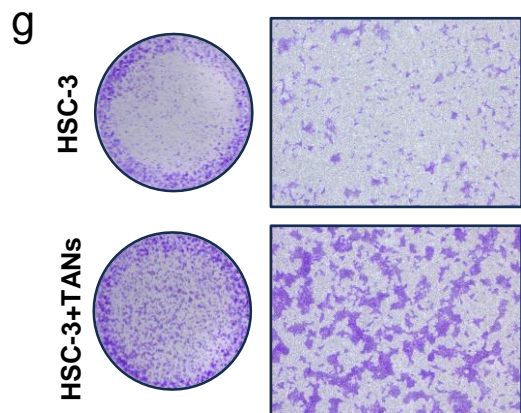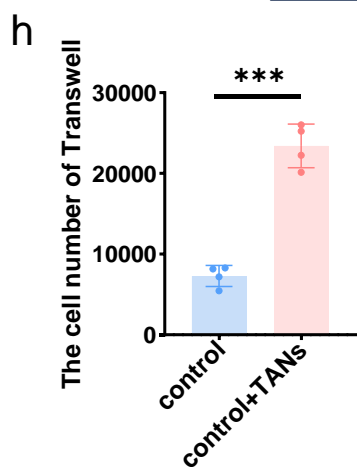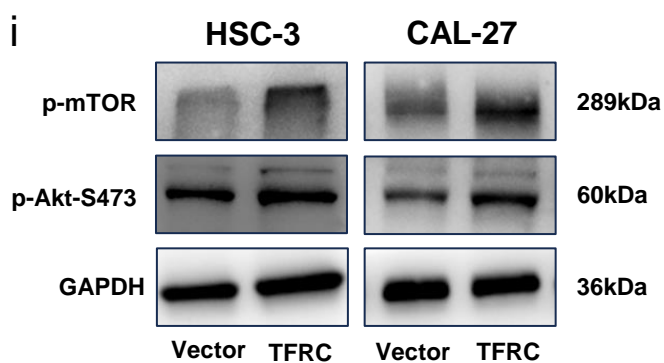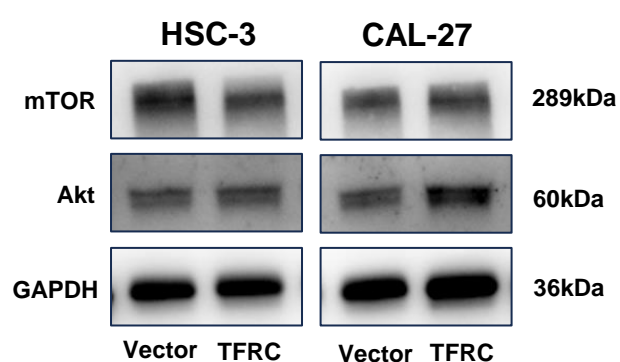

## supplementary Fig. 2 The effects of TANs in OSCC progression

(a) Linear fit analysis TANs and TF correlation, x-axis  $\text{Log}^{10}$  (TF), y-axis LN (TANs). (b) Representative immunofluorescence images of WPOI<sup>1-3</sup> and WPOI<sup>4-5</sup> OSCC tissues and TFRC immunohistochemistry of corresponding serial sections. (c) Graphical summary of TANs and TF at ITF in WPOI1-3 and WPOI4-5 OSCC, P=unpaired t-test. (d) Proportion of patients with TANs<sup>high</sup>TFRC<sup>high</sup> and TANs<sup>low</sup>TFRC<sup>low</sup> distribution at ITF in WPOI1-3 and WPOI4-5 OSCC, P=Chi-square test. (e) Representative fluorescent images of HSC-3 with or without TANs. (f) Relative luminescence of HSC-3 with or without TANs, P=paired t-test. (g) Representative images of HSC-3 invading to the bottom of wells in low (left) and high (right) magnification with or without TANs, P=paired t-test. (h) Graphical summary of HSC-3 invading to the bottom of wells with or without TANs, P=paired t-test. (i) Protein levels of Akt, mTOR, p-Akt and p-mTOR between vector and TFRC of HSC-3 and CAL-27. \*\* and \*\*\* represented differences were considered statistically significant with  $p < 0.01$  and  $p < 0.001$ , respectively
